# Supplementary material for: Oral swabs as a proxy for direct ruminal microbiome sampling in Holstein dairy cows is correlated with sample color
Source: Frontiers journal article supplement (doi:10.3389/fmicb.2024.1466375), 2024-09-17
Supplement: Data_Sheet_2.PDF [file Data_Sheet_2.PDF]

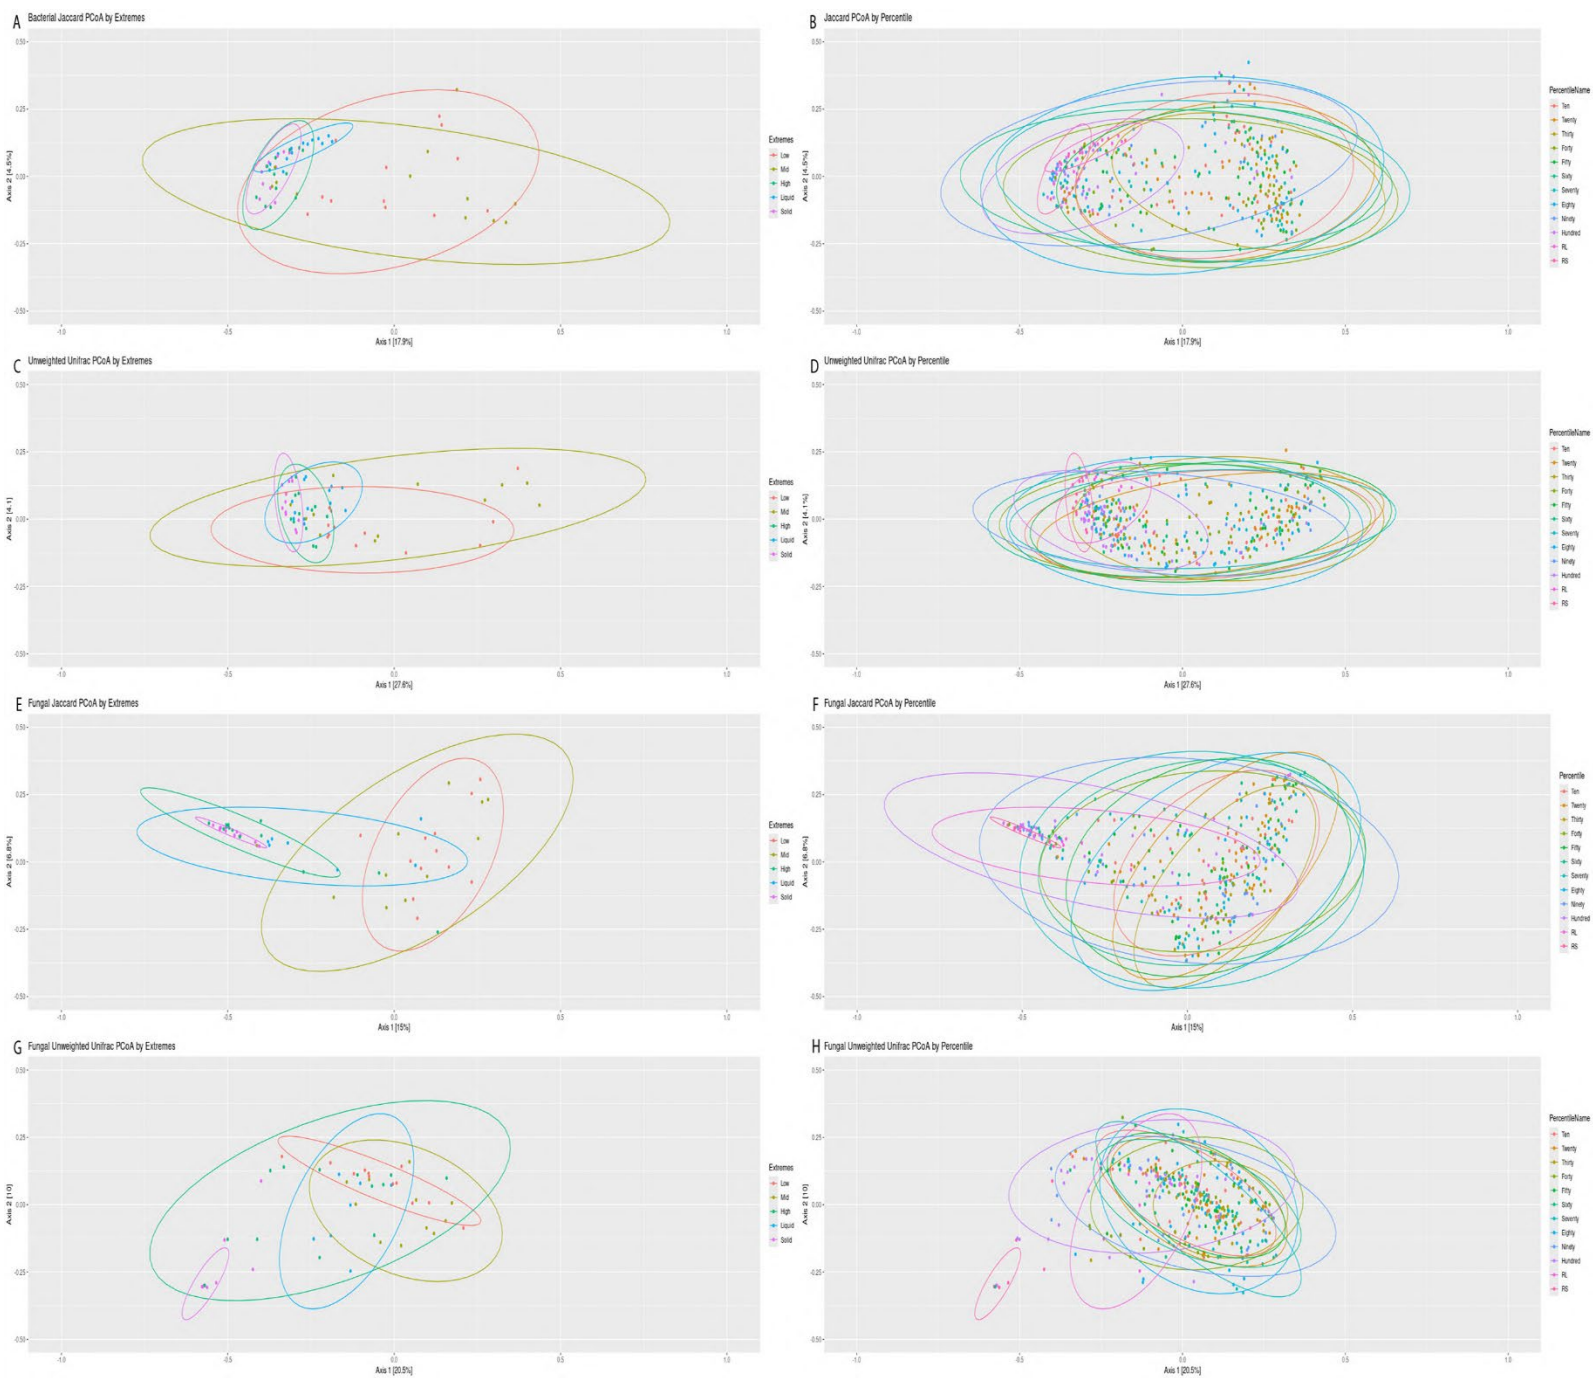

**Supplementary Figure 2.** Jaccard and Unweighted Unifrac PCoAs for Percentiles and Extremes bacterial and fungal datasets.
